# Supplementary material for: Annual and spatial variation in composition and activity of terrestrial mammals on two replicate plots in lowland forest of eastern Ecuador
Source: PeerJ journal article supplement (doi:10.7717/peerj.4241), 2018-01-09

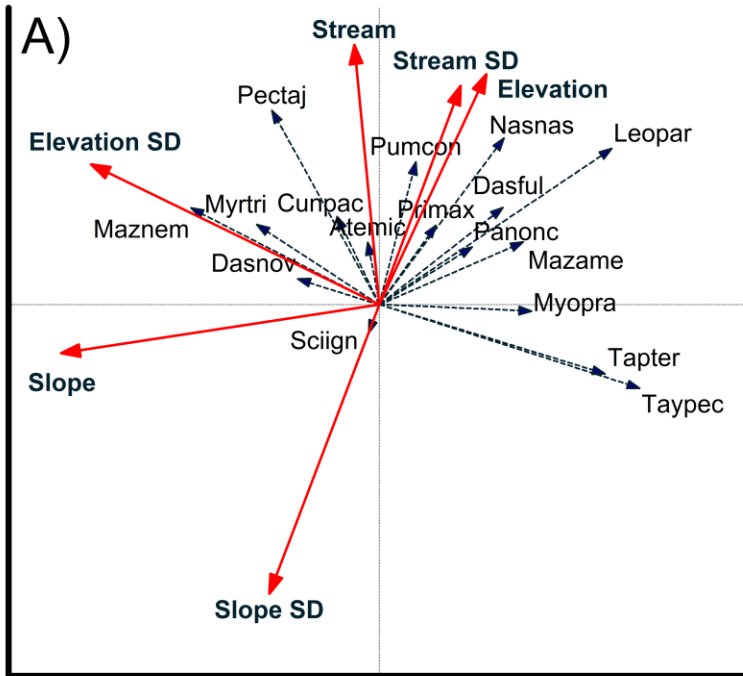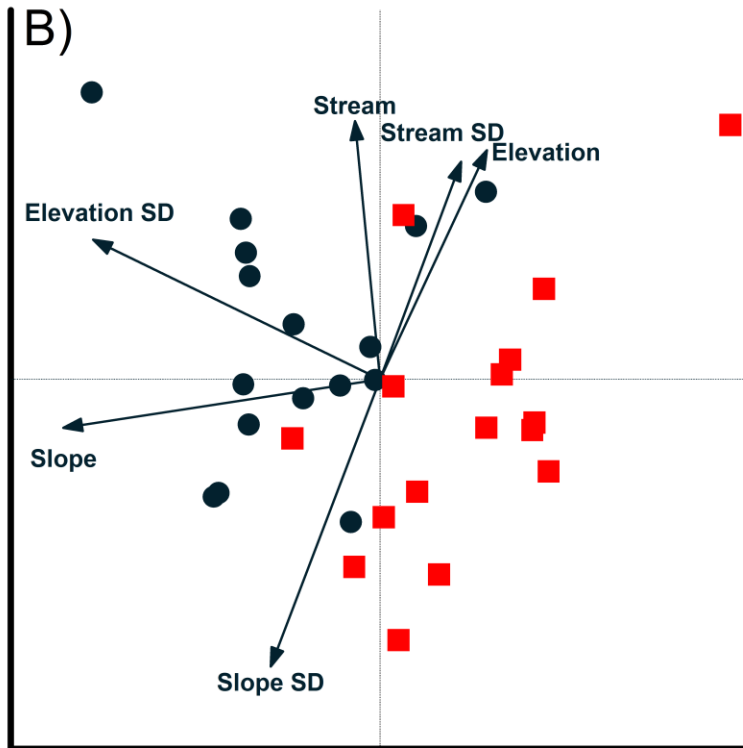

Supplement: Supplemental_Figure_S1.pdf [file Supplemental_Figure_S1.pdf]
